1 **Title (100/150):** *UBTF* Tandem Duplications in Pediatric MDS and AML: Implications for  
2 Clinical Screening and Diagnosis

3

4 **Short Title (46/50):** *UBTF*-TDs in Pediatric MDS and AML

5

6 **Authors and Affiliations:**

7 Juan M. Barajas<sup>1,+</sup>, Masayuki Umeda<sup>1,+</sup>, Lisett Contreras<sup>1</sup>, Mahsa Khanlari<sup>1</sup>, Tamara  
8 Westover<sup>1</sup>, Michael P. Walsh<sup>1</sup>, Emily Xiong<sup>1</sup>, Chenchen Yang<sup>2</sup>, Brittney Otero<sup>2</sup>, Marc  
9 Arribas-Layton<sup>2</sup>, Sherif Abdelhamed<sup>1</sup>, Guangchun Song<sup>1</sup>, Xiaotu Ma<sup>3</sup>, Melvin E.  
10 Thomas 3rd<sup>1</sup>, Jing Ma<sup>1</sup>, Jeffery M. Klco<sup>1,\*</sup>

11 + Equal first authors

12 \* Corresponding author

13 1. Department of Pathology, St. Jude Children's Research Hospital, Memphis, TN,  
14 USA.

15 2. Mission Bio, South San Francisco, CA

16 3. Department of Computational Biology, St. Jude Children's Research Hospital,  
17 Memphis, TN, USA.

18 **Contact Information/Corresponding authors:**

19 \*Correspondence: [jeffery.klco@stjude.org](mailto:jeffery.klco@stjude.org)

20 Jeffery M. Klco: Mail Stop 342, Room D4047B, St. Jude Children's Research Hospital,  
21 262 Danny Thomas Place, Memphis, TN 38105-3678, Phone: (901) 595-6807, Fax:  
22 (901) 595-5947, Email: [jeffery.klco@stjude.org](mailto:jeffery.klco@stjude.org)

23 **Word Count (includes Methods/Introduction/Results/Discussion):** 3,090/4,500

24

25 **Figures:** 5/7

26

27 **Key Points:**

- 28 • Largest cohort of pediatric *UBTF*-TD in myeloid neoplasms reported to date.
- 29 • Use of single-cell DNA+protein sequencing technology in 3 *UBTF*-TD samples  
30 reveals a clonal evolution pattern characterized by sequential acquisition of  
31 *WT1* and *FLT3* mutations and a more stem cell-like protein expression pattern.
- 32 • Pediatric MDS and AML patients with *UBTF*-TD alterations dysplastic features  
33 with an increase erythroid precursors.
- 34 • Tandem duplications in exon 9 of *UBTF* represent a rare but functionally  
35 equivalent subgroup of *UBTF*-TD myeloid neoplasms.

36

37 **Impact Statement:**

38 *UBTF* tandem duplications (TD) are subtype-defining genomic alterations in adult and  
39 pediatric myeloid neoplasms. Here, we provide a comprehensive characterization of the  
40 largest cohort of pediatric *UBTF*-TD cases to date, including the recognition of  
41 additional *UBTF* alterations that mimic the exon 13 duplications in pediatric AML.

42

43 **Abstract, (200/200 words):**

44 Recent genomic studies in adult and pediatric acute myeloid leukemia (AML)  
45 demonstrated recurrent in-frame tandem duplications (TD) in exon 13 of upstream  
46 binding transcription factor (*UBTF*). These alterations, which account for ~4.3% of AMLs  
47 in childhood and up to 3% in adult AMLs under 60, are subtype-defining and associated  
48 with poor outcomes. Here, we provide a comprehensive investigation into the  
49 clinicopathological features of *UBTF*-TD myeloid neoplasms in childhood, including 89  
50 unique pediatric AML and 6 myelodysplastic syndrome (MDS) cases harboring a  
51 tandem duplication in exon 13 of *UBTF*. We demonstrate that *UBTF*-TD myeloid tumors  
52 are associated with dysplastic features, low bone marrow blast infiltration, and low white  
53 blood cell count. Furthermore, using bulk and single-cell analyses, we confirm that  
54 *UBTF*-TD is an early and clonal event associated with a distinct transcriptional profile,  
55 whereas the acquisition of *FLT3* or *WT1* mutations is associated with more stem cell-  
56 like programs. Lastly, we report rare duplications within exon 9 of *UBTF* that phenocopy  
57 exon 13 duplications, expanding the spectrum of *UBTF* alterations in pediatric myeloid  
58 tumors. Collectively, we comprehensively characterize pediatric AML and MDS with  
59 *UBTF*-TD and highlight key clinical and pathologic features that distinguish this new  
60 entity from other molecular subtypes of AML.

61

62 **Key Words:**

63 *UBTF* Tandem Duplications; Pediatric and Adult Acute Myeloid Leukemia; Myeloid  
64 Neoplasms

65

66 **Introduction:**

67 Pediatric acute myeloid leukemia (AML) and myelodysplastic syndrome (MDS) are  
68 characterized by unique genetic backgrounds when compared to those in adults (1-3).  
69 Recurrent tandem duplications (TD) of exon 13 of upstream binding transcription factor  
70 (*UBTF*) were only recently identified as potential initiating events in pediatric AML (4-7),  
71 accounting for about 4% of newly diagnosed pediatric AML. PCR-based screening  
72 covering exon 13 of *UBTF* also identified *UBTF*-TD alterations in large adult AML  
73 cohorts (8, 9). These studies significantly contributed to the accumulation of evidence of  
74 *UBTF*-TD alterations in adult AML. However, PCR-based methods potentially  
75 underestimate partial tandem duplications (PTD) extending outside the regions covered  
76 by amplicons or possible alterations not involving exon 13 (9). Also, data on *UBTF*  
77 alterations in pediatric AML is limited to screening of relatively small cohorts (4, 5), and  
78 further efforts are needed to accumulate more knowledge about the biology and  
79 clinicopathologic features of this disease entity.

80

81 *UBTF* encodes the *UBTF/UBF* protein known to regulate ribosomal RNA (rRNA)  
82 transcription and nucleolar formation (10, 11). We previously reported that expression of  
83 exon 13 *UBTF*-TD in cord blood CD34+ (cbCD34+) cells is sufficient to induce cellular  
84 proliferation, increase clonogenic activity and the establishment of a transcriptional  
85 signature that recapitulates that observed in *UBTF*-TD AML patient samples (4). Our  
86 previous analyses also demonstrated that *UBTF*-TD do not occur with other canonical  
87 alterations in pediatric AML, but that *UBTF*-TD AMLs often harbor additional somatic  
88 mutations, such as internal tandem duplications in *FLT3* (*FLT3*-ITD) and frameshift

89 mutations in *WT1*. The acquisition of these cooperating mutations can likely contribute  
90 to the stepwise progression of the disease and clonal evolution. However, our  
91 understanding of how these cooperating mutations contribute to the cellular and disease  
92 status remains to be elucidated.

93

94 To bridge these knowledge gaps, we present an extended pediatric cohort of 89 AML  
95 and 6 MDS samples with exon 13 *UBTF*-TD, showing that *UBTF*-TD is strongly  
96 associated with dysplastic features while acquisition of *FLT3*-ITD is associated with  
97 progression from MDS to AML. By leveraging bulk RNA-sequencing and single cell  
98 genomics, we show that the co-occurrence of *FLT3*-ITD and *WT1* mutations is  
99 associated with stem cell-like phenotypes. Furthermore, we identified tandem  
100 duplications within exon 9 of *UBTF* in two cases transcriptionally resembling exon 13  
101 *UBTF*-TD AML. Exon 9 *UBTF*-TDs contain hydrophobic leucine-rich sequences and can  
102 induce leukemic phenotypes in cbCD34+ cells, which recapitulate findings in exon 13  
103 *UBTF*-TD, suggesting that they likely have a shared mechanism and should be  
104 classified as the same molecular entity. These findings offer valuable insights to inform  
105 future diagnostic strategies and understanding of the molecular basis of *UBTF*-TD  
106 myeloid neoplasms.

107

## 108 **Materials/Subjects and Methods:**

### 109 *Cell Culture and Analysis of cord-blood CD34+ Cell Models*

110 *UBTF*-TD cbCD34+ models were generated as previously described (4). Freshly  
111 isolated cord blood CD34+ (cbCD34+) cells were transduced with lentiviral particles

112 from MND-PGK-mCherry constructs expressing N-terminus HA-tagged UBTF-wild-type  
113 (WT), N-terminus HA-tagged UBTF-TD, N-Terminus HA-tagged UBTF-TD78-exon9 or  
114 N-Terminus HA-tagged UBTF-TD153-exon9. Transduced cells were sorted for mCherry  
115 positivity and expanded as previously described(4). Molecular experiments were  
116 performed at 40-60 days after sorting unless otherwise noted. For cytopins, 100,000  
117 cells were washed with 1X PBS and spun onto Superfrost Plus Microscope slides (12-  
118 660-16, Fisher Scientific) at 800 rpm for 5 min.

119

#### 120 *DNA Single-Cell Sequencing and Analysis*

121 Single-cell targeted sequencing was performed using Tapestri System from Mission Bio  
122 (missionbio.com). A panel of 162 PCR amplicons with an average size of 260bp was  
123 designed using Tapestri Designer from Mission Bio (designer.missionbio.com), as well  
124 as a manually designed amplicon targeting the *UBTF* exon13 TD region. This panel  
125 consists of amplicons targeting *UBTF* tandem duplicated regions, common mutations in  
126 *UBTF*-TD AML, and mutations specific to cases presented in this manuscript  
127 (**Supplemental Table 2**). Cryopreserved UBTF-TD primary AML samples were thawed  
128 and subjected to dead cell removal using the EasySep™ Dead Cell Removal Kit  
129 (STEMCELL Technologies, cat# 17899). Live cells were then subjected to the Mission  
130 Bio DNA+Protein protocol per manufacturer's instructions (missionbio.com). Libraries  
131 were then sequenced on the Novaseq platform (100M read pairs for DNA libraries and  
132 225M read pairs for protein libraries). Bam files, loom files, h5 files, and QC metrics  
133 were produced via a customization of the Tapestri pipeline developed by Mission Bio  
134 (support.missionbio.com/hc/en-us). Analysis of the samples was completed using the

135 Mosaic package v3.0.1 ([missionbio.github.io/mosaic/](https://missionbio.github.io/mosaic/)). Reads for the *UBTF* and *FLT3*-  
136 ITD calls were isolated from bam files using the pysam python package v0.21.0  
137 ([github.com/pysam-developers/pysam](https://github.com/pysam-developers/pysam)). Reads were then realigned to ITD contigs  
138 reported in previous studies (4) using the BWA aligner v0.7.15-r1140 (12, 13). When  
139 necessary, mutation VAFs were adjusted using pysam.

140

#### 141 *RNA-sequencing and genomic profiling*

142 As we previously performed (1), RNA reads from newly sequenced samples and from  
143 publications were mapped to the GRCh37/hg19 human genome assembly using the  
144 StrongARM pipeline (14). Chimeric fusion detection was carried out using CICERO  
145 (v0.3.0)(15). For somatic mutations calling from RNA-seq BAM files, we applied  
146 Bambino (v1.07)(16) for SNV and RNAindel (v3.0.4) (17, 18) focusing on 87 predefined  
147 genes recurrently mutated in pediatric AML and myelodysplastic syndrome. UBTF-TD  
148 screening was performed as we have reported (4). For the cases with TWIST capture  
149 sequencing, we called mutations as previously described (4). We also collected  
150 mutation calls with DNA data from referenced publication in Supplemental Table 5.

151

#### 152 *Transcriptome analysis*

153 Gene expression analysis was performed as previously described (1). Briefly, an RNA-  
154 seq cohort was established by integrating UBTF cases with RNA-seq data in this study  
155 (n=96) and AML in other categories from the published study (1) (n=837) and cbCD34+  
156 cells (n=5). Reads from aligned RNA-Seq BAM files were assigned to genes and  
157 counted using HTSeq (v0.11.2) (19) with the GENCODE human release 19 gene

158 annotation. The count data were transformed to log<sub>2</sub>-counts per million (log<sub>2</sub>CPM)  
159 using Voom available from R package Limma (v3.50.3) (20). The top variable genes  
160 were selected using the "vst" method in Seurat package (21). The expression data were  
161 then scaled, and PCA (Principal Component Analysis) was performed on the scaled  
162 data using the top 265 variable genes. Dimension reduction was performed using  
163 UMAP (Uniform Manifold Approximation and Projection) (22) with the top 100 principal  
164 components. Differential gene expression analysis was performed by Limma between  
165 groups as indicated in each figure, and we set Log<sub>2</sub> CPM = -1 if it is < -1 based on the  
166 Log<sub>2</sub> CPM data distribution. *P* values were adjusted by the Benjamini-Hochberg method  
167 to calculate the false discovery rate (FDR) using R function `p.adjust`. Genes with  
168 absolute fold change > 2 and FDR < 0.05 were regarded as significantly differentially  
169 expressed. Gene Set Enrichment Analysis (GSEA) was performed by GSEA (v4.2.3)  
170 using MSigDB gene sets `c2.all` (v7.5.1) (23). Permutations were done 1000 times  
171 among gene sets with sizes between 15 and 1500 genes.

172

### 173 *Statistics*

174 Details about statistical comparisons are provided in each figure legend. All the  
175 computations were done using R or GraphPad Prism, and all *P* values are 2-sided.

### 176 **Results:**

#### 177 *UBTF-TD in pediatric myeloid neoplasms.*

178 Our previous study described the molecular features of 27 pediatric AML cases with  
179 tandem duplications in exon 13 of *UBTF* (*UBTF*-TD) (4). To expand the cohort and  
180 better understand the biology, we screened RNA-sequencing data of pediatric MDS and



181 AML cases and identified an additional 68 cases from available datasets and previously  
182 published studies (2, 24) and routine clinical service at St. Jude Children's Research  
183 Hospital. All 95 cases (median age = 14 yrs., range = 2.4-27.4) possessed exon 13  
184 *UBTF*-TDs encoding a consensus hydrophobic leucine-rich ELTRLLARM motif within  
185 the duplications (**Figure 1A, Supplemental Table 1**). The duplications resulted in an  
186 increased size of exon 13 (median size = 60 bp, range = 45-339) (**Figure 1B**).  
187 Consistent with previous findings, *UBTF*-TD did not co-occur with other subtype-  
188 defining alterations and showed high variant allele frequencies (VAFs, median = 36.3%,  
189 Interquartile range (IQR) = 10.2%), further supporting our previous assertion that *UBTF*-  
190 TD alterations are early clonal events (1, 4) (**Figure 1C**). We further investigated the  
191 mutational background of this *UBTF*-TD cohort, confirming a strong association with a  
192 normal or trisomy 8 karyotype (**Figure 1C-E**), as well as with internal tandem  
193 duplications (ITD) in *FLT3* (n=55, 57.9%) and mutations in *WT1* (n=39, 41.1%), which  
194 are highly co-occurring (**Figure 1F**,  $P=0.011$ , Fisher's exact test) with 30.1% (n=29)  
195 cases harboring both alterations. In addition, 26.6% (n=25) of cases also had at least  
196 one mutation in Ras-MAPK pathway genes: *NRAS* (n=17, 17.9%); *PTPN11* (n=5, 5.3%);  
197 *RIT1* (n=5, 5.3%); *NF1* (n=4, 4.2%); *CBL* (n=2, 2.1%); and *KRAS* (n=2, 2.1%). Other  
198 recurrent mutations in myeloid malignancies were rarely observed, including *IDH1/IDH2*  
199 (n=3, 3.2%), *BCOR* (n=2, 2.1%), and *RUNX1* (n=1, 1.1%). Although our previous  
200 studies only evaluated AML samples, we also identified *UBTF*-TD in 6 cases of MDS  
201 with normal karyotype. These include 3 out of 46 primary MDS cases (6.2%) from our  
202 previously published cohort (2). Five of the six MDS cases were classified as childhood  
203 MDS with increased blasts according to the current WHO classification (25) and lacked

204 known germline predispositions to pediatric MDS or monosomy 7/del7q. No *FLT3*-ITD  
205 mutations were detected in the 6 MDS cases, while *WT1* mutations were present in 3  
206 out of the 6 MDS cases, suggesting clonal evolutionary patterns initiating with *UBTF*-TD  
207 alterations.

208

209 To address clonal evolution in *UBTF*-TD myeloid neoplasms, we utilized a droplet-  
210 based single cell multi-omics platform from MissionBio (**Figure 2**)(26). This platform  
211 enables the concurrent detection of *UBTF*-TD alterations and somatic mutations present  
212 by a custom targeted DNA panel and cell classification by using DNA-oligo conjugated  
213 antibodies targeting cell surface markers at the single cell level (**Supplemental Table**  
214 **2**). In a single timepoint AML case, we found a clonal *UBTF*-TD alteration in the myeloid  
215 population and subclonal mutations in *NRAS* (p.G12D), *FLT3* (p.V592D), and *WT1*  
216 (p.359fs), suggesting *UBTF*-TD as an initiating event (**Supplemental Table 3, Figure**  
217 **2A-B**). A *WT1* mutation was broadly present in the myeloid population, while *NRAS* or  
218 *FLT3* mutations were subclonal to *WT1* in a mutually exclusive manner, representing  
219 branched evolution of the *UBTF*-TD-*WT1*<sup>+</sup> clone. We also found that cells with  
220 *WT1*<sup>+</sup>*FLT3*<sup>+</sup> mutations were associated with high stem cell marker expression (CD34,  
221 CD117, or CD123) compared with the *UBTF*-TD-only population, whereas the  
222 *WT1*<sup>+</sup>*NRAS*<sup>+</sup> population was characterized by low expression of these markers. In a  
223 diagnosis and relapse-paired case, we found that the identical *UBTF*-TD was retained  
224 through disease progression along with a *FLT3*-ITD alteration (**Figure 2C-D**).  
225 Interestingly, a minor *WT1*<sup>+</sup> (p.R375fs) subclone at diagnosis was eradicated after  
226 chemotherapy, whereas a different *WT1*<sup>+</sup> (p.R353fs) clone became dominant at relapse,

227 showing high expression of CD34, CD117, and CD123. These data collectively confirm  
228 that *UBTF*-TD is an early initiating event, while somatic mutations are subclonal to  
229 *UBTF*-TD, possibly contributing to disease progress toward subclones with unique  
230 expression profiles.

231

### 232 *Clinical features of UBTF-TD pediatric myeloid neoplasms*

233 *UBTF*-TD AML showed a variety of morphologic features associated with cellular  
234 differentiation, as evidenced by variable FAB (French-American-British) classifications  
235 (**Figure 3A, Supplemental Table 4**). Although AML with maturation (FAB M2) was the  
236 most common (19/43, 44.2%), cases with FAB M6 (erythroid) features were also  
237 observed, as was also recently described for *UBTF*-TD AMLs in adults(9). Morphologic  
238 assessments also revealed that *UBTF*-TD cases often displayed pleomorphic blasts  
239 (**Figure 3B**), accompanied by background multilineage dysplasia and increased  
240 erythroid precursors. *UBTF*-TD AMLs showed lower white blood cell count (median =  
241  $8.4 \times 10^9/L$ , IQR =  $41.4 \times 10^9/L$ ) and bone marrow blast percentage (mean = 33%, IQR =  
242 41.4%) when compared to other AMLs, including those with similar transcriptional  
243 profiles like AML with *NUP98*-rearrangements or *NPM1* mutations(1, 4) (**Figure 3C-D**).  
244 *FLT3*-ITD, but not *WT1* mutations, were associated with a higher WBC count and bone  
245 marrow blasts in *UBTF*-TD AMLs (**Figure 3E**). Despite the presence of dysplastic  
246 features, cytogenetic studies commonly found either a normal karyotype (58/95, 61.1%)  
247 or trisomy 8 (27/95, 28.4%), and myelodysplasia-related chromosomal changes or  
248 myelodysplasia-related mutations were overall rare, suggesting that *UBTF*-TD itself  
249 contributes to dysplastic features (**Supplemental Table 4**). Considering these overall

250 features, the majority of *UBTF*-TD AMLs (83/89, 93.3%) are best classified as “Acute  
251 myeloid leukemia with other defined genetic alterations” in the current WHO  
252 classification(25) (**Supplemental Table 4**).

253

#### 254 *Transcriptional features of UBTF-TD myeloid neoplasms*

255 We and others have previously shown that AML with *UBTF*-TD is characterized by high  
256 *HOXA* and *HOXB* cluster gene expression, similar to *NPM1*-mutated or *NUP98::NSD1*  
257 AML (1, 4, 8). To further define the unique expression profiles of *UBTF*-TD, we  
258 established an RNA-seq cohort consisting of various AML subtypes (1) (n=837), cord  
259 blood CD34+ samples from healthy donors (n=5), and *UBTF*-TD AML and MDS  
260 samples (n=94: 1 *UBTF*-TD case did not have RNA-seq data available) (**Figure 4A**).

261 Consistent with previous data, *UBTF*-TD cases clustered with *NPM1*-mutated and  
262 *NUP98::NSD1* AMLs. However, *UBTF*-TD displayed a significantly higher expression of  
263 a subset of *HOXB* cluster genes (e.g., *HOXB8*, *HOXB9*) compared with *NUP98::NSD1*  
264 AML (**Figure 4B**). We also observed uniquely high expression of histone genes (e.g.,  
265 *HIST1H4F* and *HIST1H2B1*) compared to *NPM1*-mutated AML (**Figure 4C**), suggesting  
266 transcriptional mechanisms unique to *UBTF*-TD AML. Within *UBTF*-TD samples, those  
267 with *FLT3*-ITD and *WT1* mutations showed unique distribution on the UMAP cluster  
268 (**Figure 4D**), and each mutation group demonstrated differential gene expression  
269 against *UBTF*-TD samples without either mutation (**Figure 4E**). Co-occurrence of *WT1*  
270 and *FLT3*-ITD was associated with stemness-related genes (e.g., *CD34* and *DNTT*,  
271 **Figure 4E-F**), and Gene Set Enrichment Analysis (GSEA) confirmed enrichment of  
272 stemness or cell cycle-related gene expression in *WT1*<sup>+</sup>*FLT3*-ITD<sup>+</sup> *UBTF*-TD samples

273 **(Figure 4G)**. These results show the unique expression profile of *UBTF*-TD AML and  
274 the specific influence of additional cooperating mutations, which can likely influence  
275 patterns of clonal evolution.

276

#### 277 *Exon 9 tandem duplications in UBTF*

278 Given the recurrent *UBTF* exon 13 alterations duplicating specific hydrophobic amino  
279 acid sequences, we hypothesized that *UBTF* alterations outside exon 13 resulting in  
280 similar amino acid sequences could be found in cases without defining alterations but  
281 with a similar expression signature. By close inspection of the *UBTF* gene using RNA-  
282 sequencing data, we found two pediatric AML cases without exon 13 *UBTF*-TD or other  
283 driver alterations that instead have in-frame tandem duplications (lengths of 78 and  
284 153bp) in exon 9 of *UBTF* (TD-exon9), encoding short hydrophobic amino acid  
285 sequences (**Figure 5A-B**). These cases express *HOXA/B* cluster genes comparably to  
286 exon 13 *UBTF*-TD (**Supplemental Figure 1**), and one had a *WT1* mutation  
287 (**Supplemental Table 5**). To test whether these exon 9 duplication events could lead to  
288 leukemic transformation, we expressed both exon 9 duplications in cbCD34+ cells using  
289 lentiviral vectors and assessed their impact on cell proliferation, clonogenic potential,  
290 and cellular morphology in comparison with control conditions and exon 13 *UBTF*-TD  
291 (**Figure 5C-D**). Colony forming unit (CFU) assay revealed that expression of both  
292 *UBTF*-TD-exon9 increased total colony number (**Figure 5E**). After the second round of  
293 replating, cells with *UBTF*-TD-exon9 showed an immature morphology along with  
294 erythroid features, similar to exon 13 *UBTF*-TD expressing cells (**Figure 5F**).  
295 Furthermore, cells expressing *UBTF*-TD-exon9 as well as *UBTF*-TD-exon13 showed a

296 proliferative advantage compared to *UBTF*-WT and vector controls (**Figure 5G**).  
297 Collectively, these data highlight a tandem duplication in *UBTF* exon 9 as a defining  
298 alteration functionally equivalent to exon 13 tandem duplications.

299

### 300 **Discussion:**

301 In this study, we extended our cohort of pediatric myeloid malignancies with exon 13  
302 *UBTF*-TD, which now includes 95 pediatric cases. Similar to studies in adults (9),  
303 pediatric myeloid tumors with *UBTF*-TD are associated with lower bone marrow blast  
304 infiltration and lower white blood cell count, suggesting a similar clinical presentation. In  
305 this pediatric cohort, we observed that *UBTF*-TD is associated with an M2 morphology  
306 subtype (44.2%) according to FAB classification (27). These morphological features  
307 align with findings in adult cases, which showed a high prevalence of FAB M6 and M2  
308 cases (9). Furthermore, the presence of dysplastic features and the observation that  
309 *UBTF*-TD occurs in cases of pediatric MDS suggest that MDS and AML could be part of  
310 a continuum driven by *UBTF*-TD. Progression to AML may require the acquisition of  
311 cooperating mutations such as *FLT3*-ITD, supported by the finding that none of the  
312 MDS cases in this cohort harbor a *FLT3*-ITD alteration.

313

314 To evaluate the impact of these cooperating mutations on cellular status, we analyzed  
315 RNA-seq data of *UBTF*-TD cases with or without mutations, showing that the co-  
316 occurrence of *FLT3*-ITD and *WT1* is strongly associated with stem cell features and  
317 represented by CD34 expression or quiescent states. These findings were further  
318 supported by single cell studies. Given that *WT1* mutations are often subclonal

319 alterations that expand at relapse and that the co-occurrence of these mutations is  
320 associated with particularly dismal outcomes (4), acquiring these stem-like features can  
321 contribute to resistance to conventional chemotherapy. Furthermore, a recent study  
322 showed that UBTF-TD localizes to HOXA/B genomic regions and that Menin inhibition is  
323 sufficient to promote terminal differentiation (28). How these other mutations co-operate  
324 with UBTF-TD to maintain stem cell features requires further evaluation.

325

326 Given that exon 13 *UBTF*-TD has been underappreciated in standard computational  
327 pipelines, we investigated other possible *UBTF* alterations in pediatric AML cases  
328 without a defined driver event and demonstrated that in-frame tandem duplications in  
329 exon 9 of *UBTF* are possible driver alterations. Although rare within cases with *UBTF*  
330 alterations (2/97 *UBTF*-TD cases, 2.1%), cases with tandem duplications in exon 9  
331 show similar transcriptional profiles to exon 13 *UBTF*-TD AML. We further show that  
332 exon 9 alterations can induce leukemic changes, including hematopoietic cell growth  
333 and increased clonogenicity in cbCD34+ cells similar to exon 13 alterations. At the  
334 amino acid level, exon 9 tandem duplications contain amino acid sequences  
335 (LKDKFDGLTI) that share hydrophobic  $\alpha$ -helix structure with recurrently duplicated  
336 sequences in exon 13 tandem duplications (LTRLLARM), suggesting a shared  
337 mechanism. Importantly, PCR-based screening can underestimate PTD or these exon 9  
338 alterations since they are outside the covered regions(9), and we propose that  
339 enhanced sequencing-based strategies are needed to accurately diagnose this entity.  
340 The findings presented here will help build on our understanding of UBTF-TD myeloid

341 neoplasms and further support it's recognition as a distinct entity in future classification  
342 systems.

343

344

345 **Acknowledgements:**

346 The work was funded by the American Lebanese and Syrian Associated Charities of St.  
347 Jude Children's Research Hospital and funds from the US NIH, including F32 HL154636  
348 (JMB), U54 CA243124 and R01 CA276079 (JMK). The content, however, does not  
349 necessarily represent the official views of the NIH and is solely the responsibility of the  
350 authors. The studies were also funded by the Jane Coffin Childs Fund (JMB). JMK  
351 holds a Career Award for Medical Scientists from the Burroughs Wellcome Fund.  
352 Support was also provided by Shared Resources provided through the St. Jude  
353 Comprehensive Cancer Center (P30-CA21765), Flow Cytometry and Cell Sorting,  
354 Comparative Pathology Core, and Genome Sequencing (Hartwell Center).

355

356 **Author Contributions:**

357 Contributions: Conceptualization, J.M.K; Methodology, J.M.B., L.C., E.X.; Software,  
358 Validation, J.M.B., L.C., E.X.; Formal Analysis, J.M.B., M.U., B.O., M.A.L., M.K.;  
359 Investigation, J.M.B., M.U., L.C., M.P.W., M.K., M.E.T., X.M.; Resources, J.M.K.; Data  
360 Curation, T.W., G.S.; Writing – Original Draft, J.M.B., M.U.; Writing – Review & Editing,  
361 all authors were involved in review & editing of the manuscript; Visualization, J.M.B.,  
362 M.U.; Supervision, J.M.K., Project Administration, J.M.B., M.U., T.W., S.A., J.M.K.;  
363 Funding Acquisition, J.M.B., J.M.K.



364

365 **Competing Interests:** C.Y., B.O., and M.A. are employed by Mission Bio, Inc. No other  
366 authors have conflicts to declare.

367

368 **Data Availability Statement:**

369 Samples from patients with MDS or AML from St. Jude Children’s Research Hospital  
370 tissue resource core facility were obtained with written informed consent using a  
371 protocol approved by the St. Jude Children’s Research Hospital institutional review  
372 board (IRB). Studies were conducted in accordance with the International Ethical  
373 Guidelines for Biomedical Research Involving Human Subjects. The expression data  
374 newly generated in this study (RNA-Seq: n=3) and scDNA + protein sequencing (n=3)  
375 have been deposited in the European Genome-Phenome Archive (EGA) which is  
376 hosted by the European Bioinformatics Institute (EBI), under accession  
377 [EGAS00001005760](https://ega-archive.org/studies/EGAS00001005760). The remaining RNA-Seq data are available via EGA, St. Jude  
378 Cloud or TARGET as defined in **Supplemental Table 6**. Information about TARGET  
379 can be found at <http://ocg.cancer.gov/programs/target>. Other data generated in this  
380 study are available in the Supplemental tables or upon request to the corresponding  
381 author.

382 **Citations:**

383

384 1. Umeda M, Ma J, Westover T, Ni Y, Song G, Maciaszek J, et al. Proposal of a  
385 new genomic framework for categorization of pediatric acute myeloid leukemia  
386 associated with prognosis. Res Sq. 2023.

- 387 2. Schwartz JR, Ma J, Lamprecht T, Walsh M, Wang S, Bryant V, et al. The  
388 genomic landscape of pediatric myelodysplastic syndromes. *Nat Commun.*  
389 2017;8(1):1557.
- 390 3. Bolouri H, Farrar JE, Triche T, Jr., Ries RE, Lim EL, Alonzo TA, et al. The  
391 molecular landscape of pediatric acute myeloid leukemia reveals recurrent structural  
392 alterations and age-specific mutational interactions. *Nat Med.* 2018;24(1):103-12.
- 393 4. Umeda M, Ma J, Huang BJ, Hagiwara K, Westover T, Abdelhamed S, et al.  
394 Integrated genomic analysis identifies UBTF tandem duplications as a recurrent lesion  
395 in pediatric acute myeloid leukemia. *Blood Cancer Discov.* 2022.
- 396 5. Kaburagi T, Shiba N, Yamato G, Yoshida K, Tabuchi K, Ohki K, et al. UBTF-  
397 Internal tandem duplication as a novel poor prognostic factor in pediatric acute myeloid  
398 leukemia. *Genes Chromosomes Cancer.* 2022.
- 399 6. Stratmann S, Yones SA, Mayrhofer M, Norgren N, Skaftason A, Sun J, et al.  
400 Genomic characterization of relapsed acute myeloid leukemia reveals novel putative  
401 therapeutic targets. *Blood Adv.* 2021;5(3):900-12.
- 402 7. Ma X, Liu Y, Liu Y, Alexandrov LB, Edmonson MN, Gawad C, et al. Pan-cancer  
403 genome and transcriptome analyses of 1,699 paediatric leukaemias and solid tumours.  
404 *Nature.* 2018;555(7696):371-6.
- 405 8. Georgi JA, Stasik S, Eckardt JN, Zukunft S, Hartwig M, Rollig C, et al. UBTF  
406 tandem duplications are rare but recurrent alterations in adult AML and associated with  
407 younger age, myelodysplasia, and inferior outcome. *Blood Cancer J.* 2023;13(1):88.
- 408 9. Duployez N, Vasseur L, Kim R, Largeaud L, Passet M, L'Haridon A, et al. UBTF  
409 tandem duplications define a distinct subtype of adult de novo acute myeloid leukemia.  
410 *Leukemia.* 2023.
- 411 10. Sanij E, Hannan RD. The role of UBF in regulating the structure and dynamics of  
412 transcriptionally active rDNA chromatin. *Epigenetics.* 2009;4(6):374-82.
- 413 11. Moss T, Mars JC, Tremblay MG, Sabourin-Felix M. The chromatin landscape of  
414 the ribosomal RNA genes in mouse and human. *Chromosome Res.* 2019;27(1-2):31-  
415 40.
- 416 12. Li H, Durbin R. Fast and accurate long-read alignment with Burrows-Wheeler  
417 transform. *Bioinformatics.* 2010;26(5):589-95.
- 418 13. Li H, Handsaker B, Wysoker A, Fennell T, Ruan J, Homer N, et al. The  
419 Sequence Alignment/Map format and SAMtools. *Bioinformatics.* 2009;25(16):2078-9.
- 420 14. Wu G, Diaz AK, Paugh BS, Rankin SL, Ju B, Li Y, et al. The genomic landscape  
421 of diffuse intrinsic pontine glioma and pediatric non-brainstem high-grade glioma. *Nat*  
422 *Genet.* 2014;46(5):444-50.

- 423 15. Tian L, Li Y, Edmonson MN, Zhou X, Newman S, McLeod C, et al. CICERO: a  
424 versatile method for detecting complex and diverse driver fusions using cancer RNA  
425 sequencing data. *Genome Biol.* 2020;21(1):126.
- 426 16. Edmonson MN, Zhang J, Yan C, Finney RP, Meerzaman DM, Buetow KH.  
427 Bambino: a variant detector and alignment viewer for next-generation sequencing data  
428 in the SAM/BAM format. *Bioinformatics.* 2011;27(6):865-6.
- 429 17. Hagiwara K, Edmonson MN, Wheeler DA, Zhang J. indelPost: harmonizing  
430 ambiguities in simple and complex indel alignments. *Bioinformatics.* 2022;38(2):549-51.
- 431 18. Hagiwara K, Ding L, Edmonson MN, Rice SV, Newman S, Easton J, et al.  
432 RNAIndel: discovering somatic coding indels from tumor RNA-Seq data. *Bioinformatics.*  
433 2020;36(5):1382-90.
- 434 19. Anders S, Pyl PT, Huber W. HTSeq--a Python framework to work with high-  
435 throughput sequencing data. *Bioinformatics.* 2015;31(2):166-9.
- 436 20. Ritchie ME, Phipson B, Wu D, Hu Y, Law CW, Shi W, et al. limma powers  
437 differential expression analyses for RNA-sequencing and microarray studies. *Nucleic  
438 Acids Res.* 2015;43(7):e47.
- 439 21. Satija R, Farrell JA, Gennert D, Schier AF, Regev A. Spatial reconstruction of  
440 single-cell gene expression data. *Nat Biotechnol.* 2015;33(5):495-502.
- 441 22. Becht E, McInnes L, Healy J, Dutertre CA, Kwok IWH, Ng LG, et al.  
442 Dimensionality reduction for visualizing single-cell data using UMAP. *Nat Biotechnol.*  
443 2018.
- 444 23. Subramanian A, Tamayo P, Mootha VK, Mukherjee S, Ebert BL, Gillette MA, et  
445 al. Gene set enrichment analysis: a knowledge-based approach for interpreting  
446 genome-wide expression profiles. *Proc Natl Acad Sci U S A.* 2005;102(43):15545-50.
- 447 24. Fornerod M, Ma J, Noort S, Liu Y, Walsh MP, Shi L, et al. Integrative Genomic  
448 Analysis of Pediatric Myeloid-Related Acute Leukemias Identifies Novel Subtypes and  
449 Prognostic Indicators. *Blood Cancer Discov.* 2021;2(6):586-99.
- 450 25. Khoury JD, Solary E, Abla O, Akkari Y, Alaggio R, Apperley JF, et al. The 5th  
451 edition of the World Health Organization Classification of Haematolymphoid Tumours:  
452 Myeloid and Histiocytic/Dendritic Neoplasms. *Leukemia.* 2022;36(7):1703-19.
- 453 26. Miles LA, Bowman RL, Merlinsky TR, Csete IS, Ooi AT, Durruthy-Durruthy R, et  
454 al. Single-cell mutation analysis of clonal evolution in myeloid malignancies. *Nature.*  
455 2020;587(7834):477-82.
- 456 27. Bennett JM, Catovsky D, Daniel MT, Flandrin G, Galton DA, Gralnick HR, et al.  
457 Proposed revised criteria for the classification of acute myeloid leukemia. A report of the  
458 French-American-British Cooperative Group. *Ann Intern Med.* 1985;103(4):620-5.

459 28. Barajas JM, Rasouli M, Umeda M, Hiltenbrand RL, Abdelhamed S, Mohnani R,  
460 et al. Acute myeloid leukemias with *UBTF* tandem duplications are sensitive to Menin  
461 inhibitors. *Blood*. 2023.

462

463 **Figure Legends:**

464 **Figure 1. Characterization of Tandem Duplications in Exon 13 of *UBTF*.** **A.** Genomic  
465 representation of duplicated regions (grey) from 95 cases with *UBTF* exon 13 duplications. A  
466 common duplicated region is outlined in red with the alignment of the resulting amino acid  
467 sequence. **B.** Size assessment of exon 13 resulting from the duplicated regions and associated  
468 insertion/deletions. For partial tandem duplications (n=13) extending beyond exon 13, sizes of  
469 duplicated exon 13 with insertions or deletions are included. **C.** Genomic landscape of *UBTF*-TD  
470 cases. For each case, variant allele frequency (VAF), diagnosis, karyotype, and sex are shown.  
471 **D.** Distribution of cytogenetic changes among *UBTF*-TD cases. **E.** Ribbon plot depicting  
472 association of cytogenetics with mutations common in *UBTF*-TD myeloid neoplasms. Genes  
473 coding for proteins involved in RAS/MAPK pathway are grouped together (*NF1*, *PTPN11*,  
474 *NRAS*, *KRAS*, *RIT1*, *CBL*). All other mutations in *FLT3* not classified as ITD were grouped into  
475 *FLT3*-other. **F.** Ribbon plot depicting the association of co-occurring mutations in the *UBTF*-TD  
476 cohort. Genes with only one occurrence were excluded.

477

478 **Figure 2. Clonal Dynamics of *UBTF*-TD Leukemias.** **A.** Single-cell DNA sequencing coupled  
479 with surface marker expression of *UBTF*-TD case at diagnosis. Heatmap depicting the presence  
480 of mutant allele (bottom) and relative protein abundance (top). **B.** Schematic of clonal structure  
481 in *UBTF*-TD case from A. Percentages are calculated as a proportion of total cells with a  
482 somatic mutation. **C.** Single-cell DNA sequencing of a *UBTF*-TD case with diagnosis (left) and  
483 relapse (right) paired samples. Heatmap depicts the presence of a mutant allele and protein

484 expression. **D.** Schematic of clonal dynamics in diagnosis/relapse case from C. Percentages are  
485 calculated as a proportion of total cells with a somatic mutation.

486

487 **Figure 3. Morphological and Biological Assessment of *UBTF*-TD.** **A.** Available FAB  
488 (French-American-British) classification of *UBTF*-TD AMLs (n=43). **B.** Representative Wright-  
489 Giemsa Staining of bone marrow (BM) aspirates and peripheral blood (PB) smears from 4  
490 unique *UBTF*-TD cases. Case ID, FAB/WHO classification, along with *FLT3* and *WT1* mutation  
491 status, are labeled above. **UBTF-TD-3-Childhood MDS with increased blasts:** increased  
492 erythroid cells with dysplastic morphologic features (top), dysplastic myeloid cells with salmon-  
493 colored granules, and dysplastic small megakaryocytes (bottom). **UBTF-TD-78-AML with other  
494 defined genetic alterations (Acute myeloid leukemia with maturation):** characteristic blasts  
495 and myeloid precursor cells with salmon-colored granules (top) and blasts with small Auer rods  
496 (bottom). **UBTF-TD-91-AML with other defined genetic alterations (Acute myelomonocytic  
497 leukemia):** blasts with both myeloid and monocytic/monoblastic morphologic features. PB in this  
498 patient is one of the few cases in our cohort showing hyperleukocytosis with many circulating  
499 blasts (bottom). **UBTF-TD-90-AML with other defined genetic alterations (Acute  
500 myelomonocytic leukemia):** dysplastic megakaryocytes, increased erythroid cells with  
501 dysplastic morphologic features, and blasts, many with monocytic/monoblastic morphologic  
502 features. **C.** White blood cell counts (WBC) for a pediatric AML cohort stratified by oncogenic  
503 driver subtypes. **D.** Bone marrow blast percentage for a pediatric AML cohort stratified by  
504 oncogenic driver subtypes. **E.** WBC count and BM blast percentage among *UBTF*-TD cases  
505 with different *WT1* and *FLT3* mutation status.

506

507 **Figure 4. Transcriptional characterization of *UBTF*-TD leukemias.** **A.** UMAP (Uniform  
508 Manifold Approximation and Projection) of expression profiles across a cohort of *UBTF*-TD

509 (n=94) and pediatric AML (n=839), adapted from a previous study(4). Each dot is colored by  
510 subtype-defining alterations. The black box outlines a cluster of cases with *HOXA/HOXB*  
511 dysregulation, which includes all *UBTF*-TD cases. **B.** Differentially expressed genes between  
512 *UBTF*-TD AML and *NUP98::NSD1* pediatric AML. Representative genes are annotated. **C.**  
513 Differentially expressed genes between *UBTF*-TD AML and *NPM1*-mutated pediatric AML. **D.**  
514 Distribution of *UBTF*-TD cases within the cluster with *HOXA/B* dysregulation. Each data is  
515 colored by the mutational status of *UBTF*-TD, *FLT3*-ITD, or *WT1*. MDS cases are depicted with  
516 triangles, and AML cases are with circles. **E-top.** Schematic depicting the transcriptional  
517 comparison of *UBTF*-TD cases by mutational status. **-bottom.** Venn diagram showing overlap  
518 of differentially expressed genes in *FLT3*-ITD only cases and *FLT3*-ITD+/*WT1*+ cases  
519 compared with cases without these mutations. **F.** Expression *CD34* and *DNTT* with respect to  
520 *FLT3* and *WT1* mutational status. **G.** GSEA of *UBTF*-TD cases based on mutational status.

521

522 **Figure 5. Exon 9 *UBTF* Tandem Duplications in Pediatric AML.** **A.** Identification of *UBTF*-TD  
523 cases with tandem duplications in exon 9 of *UBTF*. *UBTF*-TD-exon9 on the UMAP plot of the  
524 Pediatric AML cohort (red circles), adapted from a previous study(4). **B.** Schematic of *UBTF*  
525 protein, highlighting amino acid sequences encoded in exon 9 of *UBTF*-WT, *UBTF*-TD78-exon9,  
526 *UBTF*-TD153-exon9. Duplications resulting in short hydrophobic sequences are labeled in red.  
527 Hydrophobic residues are underlined. **C.** Experimental design to evaluate the transforming  
528 potential of *UBTF*-TD-exon9 mutants **D.** Immunoblot of lysates from cbCD34+ transduced with  
529 *UBTF*-TD-exon9 vectors and corresponding controls. Antibodies against HA-tag, *UBTF*, and  $\beta$ -  
530 actin were used. **E.** Colony forming unit assay. 2-way ANOVA with two-sided Dunnett's test was  
531 applied with *UBTF*-WT as control **F.** Cytospins isolated from CFU assay at round 2 of replating  
532 (Wright-Giemsa Staining, 400X magnification). **G.** In vitro growth curves of cbCD34+ cells  
533 expressing controls or *UBTF*-TD-e9 mutants. 2-way ANOVA with Dunnett's test was applied  
534 with *UBTF*-WT as control.

535

536

537

538



**Figure 1**
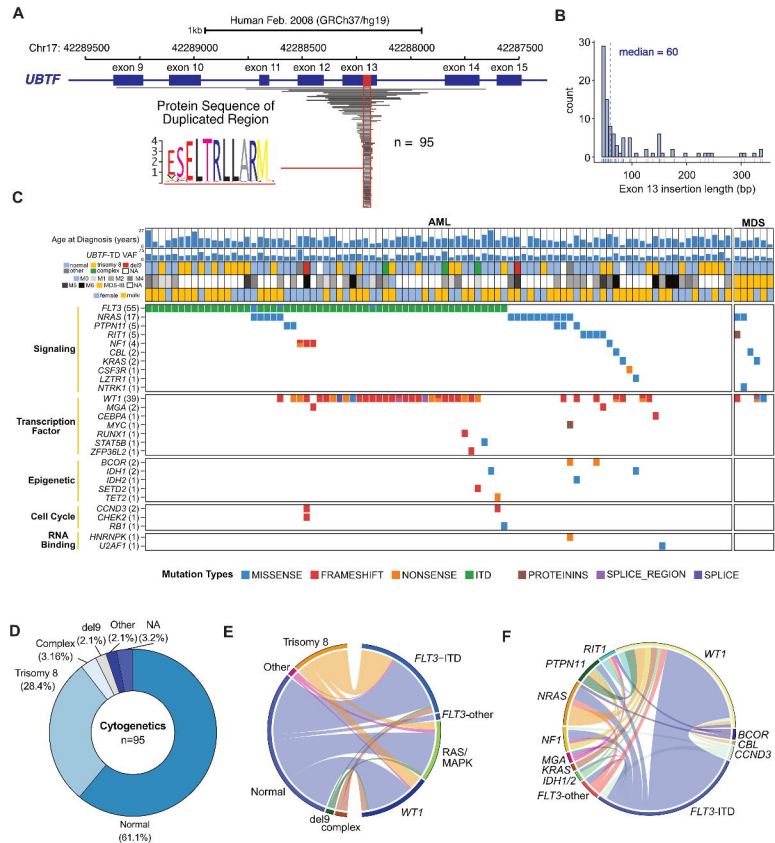

**Figure 2**

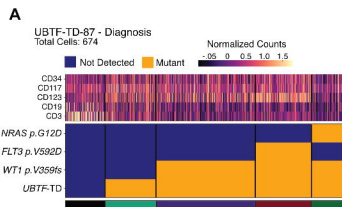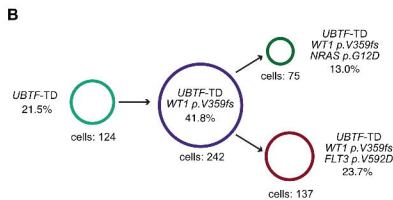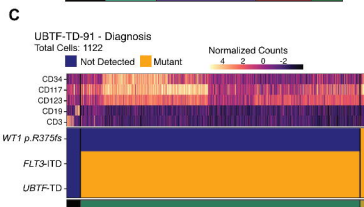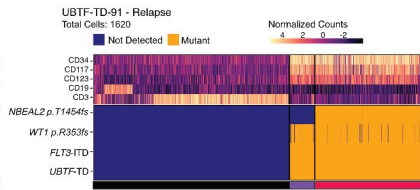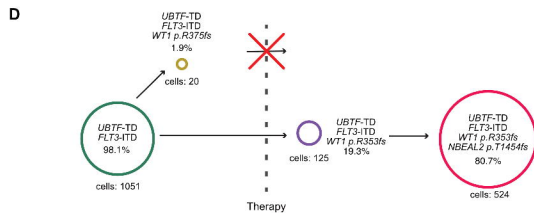

**Figure 3**

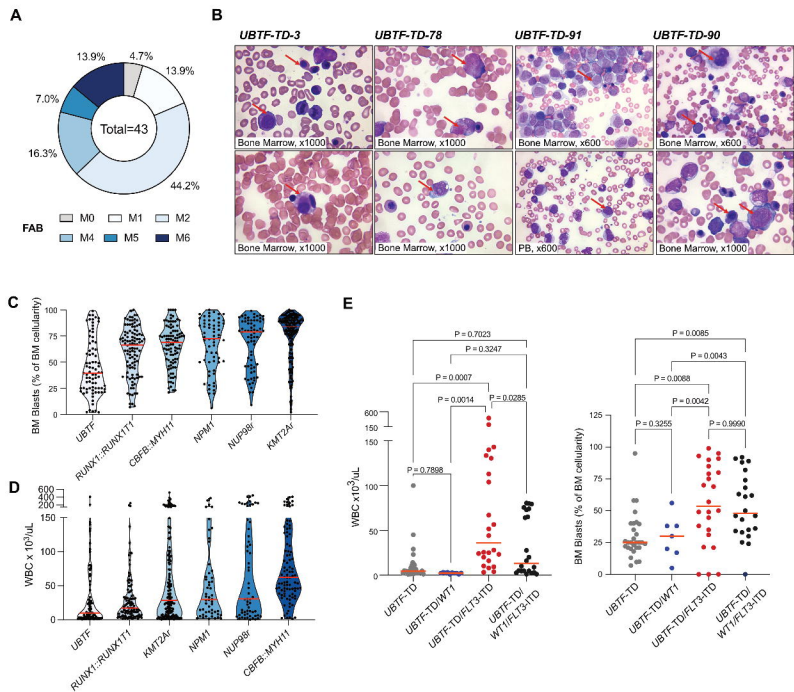

**Figure 4**

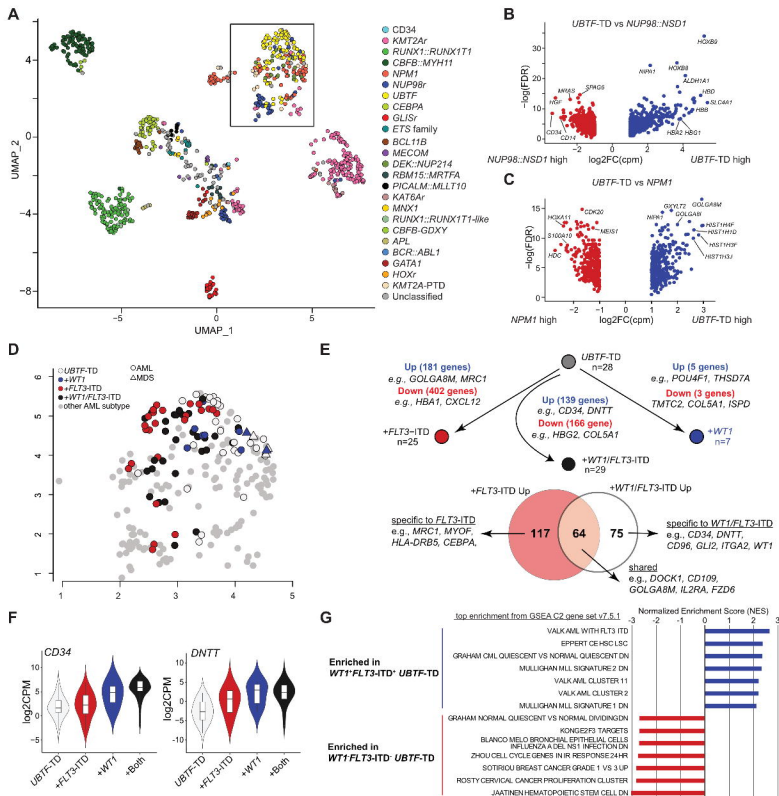

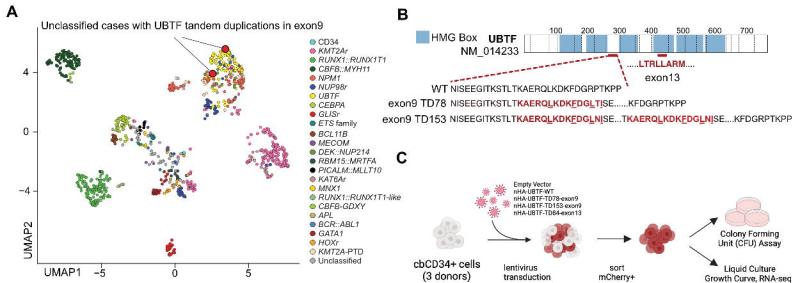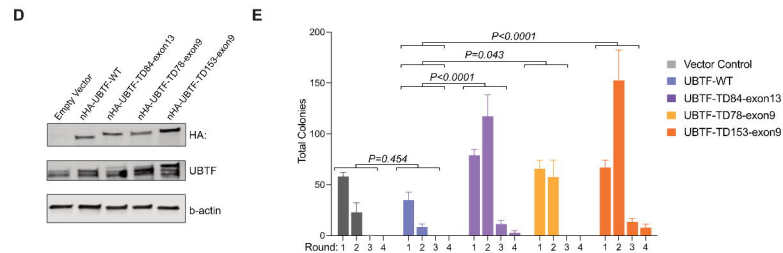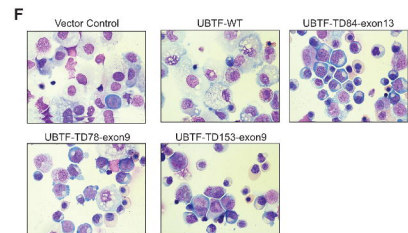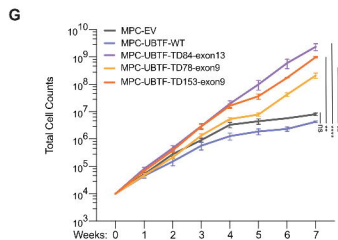

Source: https://medrxiv.org/content/10.1101/2023.11.13.23298320v1.full.pdf
